# Supplementary material for: Variation in the Floral Scent Chemistry of Nymphaea ‘Eldorado’, a Valuable Water Lily, with Different Flowering Stages and Flower Parts
Source: MDPI journal article supplement (doi:10.3390/plants13070939), 2024-03-24
Supplement: s1 [file s1]

## Supplementary Figures:

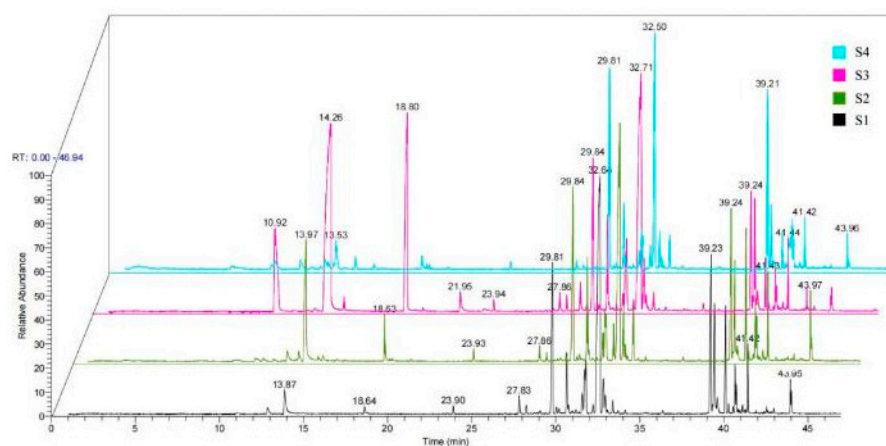

**Figure S1.** The GC-MS total ion chromatograms (TICs) for the volatile chemical profiles of *N. 'Eidorado'* at different flowering stages.

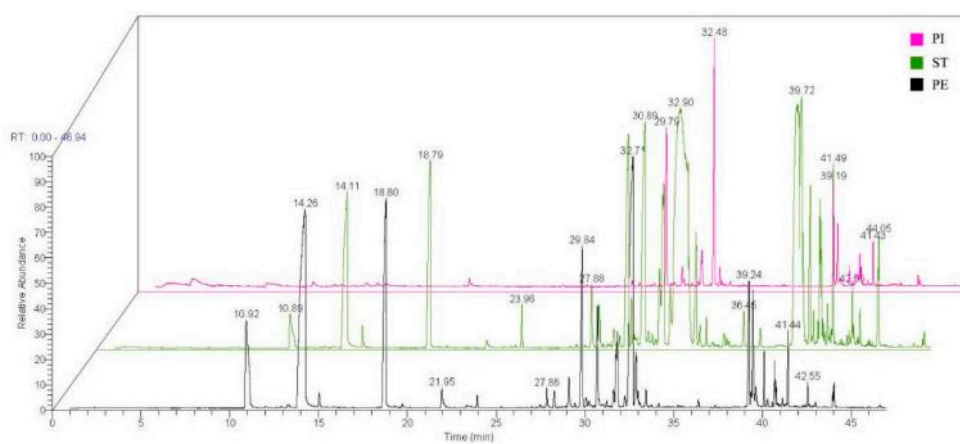

**Figure S2.** The GC-MS total ion chromatograms (TICs) for the volatile chemical profiles of different parts of *N. 'Eidorado'* flower.
